# Supplementary material
Source: MDPI journal article supplement (https://www.mdpi.com/2071-1050/14/12/7154)
Supplement: s1 [file s1]

## **Supplementary Information**

### **Potential for Artificial Intelligence (AI) and Machine**

### **Learning (ML) Applications in Biodiversity Conservation, Managing Forests, and Related Services in India**

Kadukothanahally Nagaraju Shivaprakash <sup>1,\*</sup>, Niraj Swamy <sup>2</sup>, Sagar Mysorekar <sup>1</sup>,  
Roshni Arora <sup>1</sup>, Aditya Gangadharan <sup>1</sup>, Karishma Vohra <sup>1</sup>, Madegowda Jadeyegowda <sup>3</sup>  
and Joseph M. Kiesecker <sup>4</sup>

<sup>1</sup> The Nature Conservancy Center, 37 Link Road, Lajpatnagar-3, New Delhi 110024, India

<sup>2</sup> The Nature Conservancy, Arlington, VA 22201, USA

<sup>3</sup> College of Forestry, Keladi Shivappa Nayaka University of Agricultural and Horticultural  
Sciences, Ponnampet 571216, India

<sup>4</sup> Global Lands Program, The Nature Conservancy, Fort Collins, CO 80524, USA

\* Corresponding author: shivaprakash.kn@tnc.org

1 **Table S1.** Summary of AI and machine learning application research in biodiversity conservation and forest sector.

| Major Sector                          | Area of Application                            | Specific Application        | Taxa or Ecosystem | Technology and Algorithm                                                                  | Reference                                                                                                                                                                                                                                                                                                                                           |
|---------------------------------------|------------------------------------------------|-----------------------------|-------------------|-------------------------------------------------------------------------------------------|-----------------------------------------------------------------------------------------------------------------------------------------------------------------------------------------------------------------------------------------------------------------------------------------------------------------------------------------------------|
| Terrestrial biodiversity conservation | Wildlife inventory, protection, and management | Identification and taxonomy | Mammals           | Computer vision (AI tools that can instantly classify species based on images and videos) | Trnovszky et al. 2019; Tabak et al. 2018; Chen et al. 2014; Van Horn et al. 2018; Falzon et al. 2020; Nguyen et al. 2017; Gomez et al. 2017; Yu et al. 2013; Willi et al. 2018; Wilber et al. (2013); Gomez et al. (2016); Weinstein et al. 2017; Van Horn et al. 2018; Joppa 2017; Shukla et al. 2019                                              |
|                                       |                                                |                             | Mammals           | Automated acoustic using neural networks and deep learning                                | Vaughan et al. 1997, Parsons and Jones 2000, Parsons 2001; Murray et al. 1998; Nuñez et al. 2018; Berno 2019; Wisler et al. 2016                                                                                                                                                                                                                    |
|                                       |                                                |                             | Birds             | Image recognition technique using CNN                                                     | Van Horn et al. 2018; Chen et al. 2018; (Gavves et al., 2015; Berg et al., 2014; Berg and Belhumeur, 2013; Huang et al., 2013; Branson et al., 2014; Duan et al., 2012; Atanbori et al. 2018; Atanbori et al. 2016; Gavali et al 2019; Burghardt and Campbell 2007; Branson et al. 2014; Xu and Zhu 2016; Bowley et al. 2016; Van Horn et al. 2018; |

|  |  |  |            |                                                            |                                                                                                                                                                                                                                                                                                                                                                                                                                                                                                                                                                                                                                                |
|--|--|--|------------|------------------------------------------------------------|------------------------------------------------------------------------------------------------------------------------------------------------------------------------------------------------------------------------------------------------------------------------------------------------------------------------------------------------------------------------------------------------------------------------------------------------------------------------------------------------------------------------------------------------------------------------------------------------------------------------------------------------|
|  |  |  |            |                                                            | Sullivan et al. 2018                                                                                                                                                                                                                                                                                                                                                                                                                                                                                                                                                                                                                           |
|  |  |  | Birds      | Automated acoustic using neural networks and deep learning | Vaca-Castano and Rodriguez (2010); Huang et al. (2009); Acevedo et al. (2009); Brandes (2008); Mills 1995; McIlraith and Card 1995, Anderson et al. 1996; Terry and McGregor 2002; Kershenbaum et al. 2016; Mporas et al. 2012;                                                                                                                                                                                                                                                                                                                                                                                                                |
|  |  |  | Amphibians | Automated acoustic using neural networks and deep learning | Yuan and Ramli 2013; Noda et al. 2016; Tan et al. 2014; Xie et al. 2015a, b,c,d; Xie et al. (2016); Colonna et al. (2015); Bedoya et al. (2014); Tan et al. (2014); Huang et al. (2014); Jaafar and Ramli (2013); Jaafar et al. (2013a,b); Gingras and Fitch (2013); Camacho et al. (2011); Chen et al. (2012); Colonna et al. (2012); Croker and Kottege (2012); Han et al. (2011); Dayou et al. (2011); Vaca-Castano and Rodriguez (2010); Huang et al. (2009); Lee et al. (2006); Dang et al. (2008); Huang et al. (2008); Brandes et al. (2006); Grigg et al. (1996); Yen and Fu (2002); Xie et al. 2016; Chao et al. 2019; Colonna et al. |

|  |  |                                |                                       |                                                                    |                                                                                                                                                                                                                                                                                                                                 |
|--|--|--------------------------------|---------------------------------------|--------------------------------------------------------------------|---------------------------------------------------------------------------------------------------------------------------------------------------------------------------------------------------------------------------------------------------------------------------------------------------------------------------------|
|  |  |                                |                                       |                                                                    | 2016; Taylor et al. 1996                                                                                                                                                                                                                                                                                                        |
|  |  |                                | Insects                               | Image recognition technique using CNN                              | Hernandez-Serna et al (2014); Feng et al. (2016)                                                                                                                                                                                                                                                                                |
|  |  |                                | Coral, benthic invertebrates and fish | Image recognition technique using CNN                              | Qin et al. (2016); Villon et al. (2016); Sun et al. (2016); Marburg & Bigham (2016); Beijbom et al. (2016); Hernandez-Serna et al (2014); Beijbom et al. 2015; Johnson-Roberson                                                                                                                                                 |
|  |  |                                | Insects                               | Automated acoustic using neural networks and deep learning         | Brandes (2008); Lee et al. (2006); Brandes et al. (2006); Weeks et al. 1999; Campbell et al. 1996; Ohya and Chesmore 2003; Chesmore et al. 1997, Chesmore 2001, Chesmore and Nellenbach 2001, Schwenker et al. 2003; Chesmore 2004                                                                                              |
|  |  | Wildlife census and monitoring | Mammals                               | Image recognition technique using neural network and deep learning | Sirmacek et al. 2012; Borowicz et al. 2019; Guirado et al. 2018; Norouzzadeh et al. 2018; Xue et al. 2017; Kellenberger et al. 2018; Corcoran et al. 2019; Gonzalez et al. 2016; Torney et al. 2019; Brust et al. 2017; Korschens et al. 2017; Norouzzadeh et al. 2019; Tabak et al. 2018; Chen et al. 2014; Villa et al. 2017; |

|  |                              |                      |                             |                                                                            |                                                                                                                                                                                                                                                                                                                                                              |
|--|------------------------------|----------------------|-----------------------------|----------------------------------------------------------------------------|--------------------------------------------------------------------------------------------------------------------------------------------------------------------------------------------------------------------------------------------------------------------------------------------------------------------------------------------------------------|
|  |                              |                      |                             |                                                                            | Nguyen et al. 2017; Reby et al. 1997; Clemins and Johnson 2002; Bjorck et al. 2019; Bergler et al. 2018; Garcia et al. 2020; Nuñez et al. 2018; Aodha et al. 2018                                                                                                                                                                                            |
|  |                              |                      | Birds                       | Image processing and classification using neural network and deep learning | Abd-Elrahman et al. 2005; Desell et al. 2013; Dickinson et al. 2008; Groom et al. 2011; Liu et al. 2015; Qing et al. 2011; Weinstein 2014; Bajzak and Piatt 1990; Buckland et al. 2012; Descamps et al. 2011; Trathan 2004; Press and Laliberte 2003; Fretwell et al. 2012; Witharana and Lynch 2016; Lynch et al. 2012; Barber-Meyer 2007; Aide et al. 2013 |
|  |                              | Diversity estimation | Birds                       | AI and ML based statistical algorithms                                     | Brandes 2008; Burivalova et al. 2019; Wood et al. 2019; González-Rivero et al. 2020; Aide et al. 2013; Villon et al. 2018                                                                                                                                                                                                                                    |
|  |                              |                      | Amphibians                  | AI and ML based statistical algorithms                                     | Taylor et al. 1996                                                                                                                                                                                                                                                                                                                                           |
|  | Animal behaviour and welfare |                      | Birds, mammals, frogs, fish | Pattern recognition, image recognition and automated bioacoustics          | Kembhavi 2008; McDowall and Lynch 2017; Luque et al. 2017; Rew et al. 2019; Yamazaki et al. 2019; Graving et al. 2019; Han et al. 2019; Hirakawa et al. 2018;                                                                                                                                                                                                |

|                                     |                                             |                                   |       |                                            |                                                                                                                                                                                                                                                                                                                                                                                                                                 |
|-------------------------------------|---------------------------------------------|-----------------------------------|-------|--------------------------------------------|---------------------------------------------------------------------------------------------------------------------------------------------------------------------------------------------------------------------------------------------------------------------------------------------------------------------------------------------------------------------------------------------------------------------------------|
|                                     |                                             |                                   |       |                                            | Oliver et al. 2018; Ehsani et al. 2018; Mearns et al. 2020; Browning et al. 2017; Brewster et al. 2018; Kabra et al. 2013; Dell et al. 2014; Valletta et al. 2017; Weinstein et al. 2016; Goehner et al. 2015; Burivalova et al. 2019; Metcalf et al. 2018; Azzellino et al. 2011; Andre' 2018; Senzaki et al. 2016; Dunlop et al. 2017; Mcloughlin et al. 2019; Turesson et al. 2016; Pereira et al. 2019; Metcalf et al. 2019 |
|                                     | Detecting and predicting threat to wildlife | Illegal wildlife trade            |       | Image recognition                          | Minin et al. 2018; Minin et al. 2019; Hernandez-Castro et al. 2015; Hernandez-Castro et al. 2016                                                                                                                                                                                                                                                                                                                                |
|                                     |                                             | Detecting and predicting poaching |       | Image and pattern recognition              | Chalmers et al. 2019; Bondi et al. 2018a,b; Xu et al. 2019; Banzi 2014; Mishra et al. 2010; Park et al. 2015; Kar et al. 2017; Grange 2019; Fang et al. 2015                                                                                                                                                                                                                                                                    |
| Forest and terrestrial biodiversity | Monitoring ecosystem health                 |                                   |       | Automated bioacoustics using deep learning | Aide et al. 2013; Burivalova et al. 2019; González-Rivero et al. 2020; Kroodsma et al. 2018; Nay et al. 2016                                                                                                                                                                                                                                                                                                                    |
|                                     | Predicting diversity processes              | Species diversity estimation      | Birds | AI and ML based statistical algorithms     | Brandes 2008; Burivalova et al. 2019; Wood et al. 2019; González-Rivero et al. 2020;                                                                                                                                                                                                                                                                                                                                            |

|                      |            |                                                |                             |                                                                   |                                                                                                                                                      |
|----------------------|------------|------------------------------------------------|-----------------------------|-------------------------------------------------------------------|------------------------------------------------------------------------------------------------------------------------------------------------------|
|                      |            |                                                |                             |                                                                   | Aide et al. 2013; Villon et al. 2018; Park et al. 2003; Salamon et al. 2017; Gil-Tena et al. (2010)                                                  |
|                      |            |                                                | Amphibians, Fishes, Insects | AI and ML based statistical algorithms                            | Lek-Aug et al. 1999; Lek et al., 1996; Guegan et al. 1998; Taylor et al. 1996; Chon et al. 1996; Park et al. 2003; Villon et al. 2018                |
|                      |            | Predicting species extinction status           |                             | AI and ML based statistical algorithms                            | Pelletier et al. 2018; Darrah et al. 2017; Brilliantova et al. 2018; Bland et al. 2015                                                               |
| Aquatic biodiversity | Monitoring | Monitor and map ecosystems and their condition | Freshwater and Marine       | Pattern recognition, image recognition using deep learning        | Nunes et al., 2020; Watts et al., 2011; Manté et al., 2014; Palaniswami et a., 2017; Berberoglu et al., 2004; Mohiuddin, 2014; Pereira et al., 2011; |
|                      |            | Monitor commercial fishing; fishing intensity  | Freshwater and Marine       | AI and ML based statistical algorithms                            | Kroodsma et al., 2018; Benzer et al., 2015; Álvarez-Ellacuría et al 2020; Russo et al., 2019;                                                        |
|                      |            | Monitor endangered/threatened species          | Marine                      | Pattern recognition, image recognition and automated bioacoustics | Gray et al., 2019; Hodgson et al., 2013; Bevan et al., 2015;                                                                                         |
|                      |            | Monitor marine mammals, whales in particular   | Marine                      | Pattern recognition, image recognition and automated bioacoustics | <a href="https://www.blog.google/technology/ai/protecting-orcas/">https://www.blog.google/technology/ai/protecting-orcas/</a>                        |
|                      |            | Water quantity and quality                     |                             | AI and ML based statistical algorithms                            | Fijani et al., 2019; Gunda et al., 2019; Hatzikos et al., 2007; Sharaf et al., 2017; Strobl & Robillard, 2006; Ceccaroni et al., 2018; Zhu et        |

|  |                         |                               |                       |                                        |                                                                                                                                                                                                                                                                                                                              |
|--|-------------------------|-------------------------------|-----------------------|----------------------------------------|------------------------------------------------------------------------------------------------------------------------------------------------------------------------------------------------------------------------------------------------------------------------------------------------------------------------------|
|  |                         |                               |                       |                                        | al., 2010; Sengorur et al., 2015; Khaki et al., 2015; Gharibi et al., 2012; Li et al., 2016; Hatzikos et al., 2008;                                                                                                                                                                                                          |
|  | Forecasting/Predictions | Water quality and quantity    | Freshwater            | AI and ML based statistical algorithms | Hameed et al., 2017; Chang et al., 2015; Najah et al., 2011; Rajaei et al 2020; Tung et al., 2020; Fathian et al., 2019; Toro et al., 2013; Chau, 2006; Ceccaroni et al., 2018; Wang et al., 2019; Yaseen et al., 2016; Coad et al., 2014; Elkiran et al., 2019; Najah et al., 2009; Barzegar et al., 2016; Sakizadeh, 2016; |
|  |                         | Biodiversity                  | Tidal                 | AI and ML based statistical algorithms | Yoo et al., 2013                                                                                                                                                                                                                                                                                                             |
|  |                         | Extinction probabilities      |                       | AI and ML based statistical algorithms | Cheung et al., 2005;                                                                                                                                                                                                                                                                                                         |
|  |                         | Toxicity in organisms         |                       | AI and ML based statistical algorithms | Singh et al., 2013; Sengar et al., 2017                                                                                                                                                                                                                                                                                      |
|  |                         | Organism dispersal            | Marine                | AI and ML based statistical algorithms | Pontin et al., 2011                                                                                                                                                                                                                                                                                                          |
|  |                         | Species/habitat distributions | Freshwater and Marine | AI and ML based statistical algorithms | Zarkami et al., 2012; Olaya-Marín et al., 2013; Mastrorillo et al., 1997; Muñoz-Mas et al., 2015; Palialexis et al., 2011; Pittman & Brown, 2011; Volf et al 2011; Gillard et al., 2017; Flombaum et al., 2013; Park et al., 2006; Guénard et al., 2020                                                                      |



|        |                                                           |                                                |            |                                                                    |                                                                                                                                                                                                                                                    |
|--------|-----------------------------------------------------------|------------------------------------------------|------------|--------------------------------------------------------------------|----------------------------------------------------------------------------------------------------------------------------------------------------------------------------------------------------------------------------------------------------|
|        | Species detection/identification/classification/behaviour |                                                | Marine     | Pattern recognition, image recognition and automated bioacoustics  | Siddiqui et al., 2018; Villon et al., 2018; Allken et al 2019; dos Santos et al., 2019; Labao et al., 2019; Salman et al., 2020; Xu et al., 2019; Bedoya et al., 2014; Liu et al., 2011; Mosleh et al., 2012; Song et al., 2015; Xia et al., 2018; |
|        | Assessments                                               | To estimate abundance/richness                 | Freshwater | AI and ML based statistical algorithms                             | Marini et al., 2018; Recknagel, 1997; Park et al., 2003; Mandal et al., 2018; Tang et al., 2014;                                                                                                                                                   |
|        |                                                           | Abiotic-biotic relationships                   | Freshwater | AI and ML based statistical algorithms                             | Hu et al., 2020; Tsai et al., 2017; Olden et al., 2001; Knudby et al., 2010; Koccev et al., 2010; Schletterer et al., 2010; Feio et L., 2011; Tsai et al., 2017;                                                                                   |
|        |                                                           | Community ecology/diversity/structure/function | Freshwater | AI and ML based statistical algorithms                             | Brosse et al., 2001; Moitinho-Silva et al., 2017; Brey, 2012; Gutierrez-Estrada et al 2006; Awad 2014; Franceschini et al 2019; Goethals et al., 2007; Quetglas et al., 2011; Lachkar et al., 2012; Penczak et al., 2012; Cheng et al., 2012;      |
|        | Aquaculture                                               | Fish feeding intensity                         | Freshwater | AI and ML based statistical algorithms                             | Zhou et al., 2019;                                                                                                                                                                                                                                 |
| Forest | Plant inventory and identification                        |                                                |            | Image recognition technique using neural network and deep learning | Sun et al. 2017; WaÈldchen et al. 2018; Aziah et al. 2019                                                                                                                                                                                          |
|        | Predicting diversity                                      | Predicting species                             |            | AI and ML based                                                    | Bland et al. 2015; Pelletier et                                                                                                                                                                                                                    |

|  |                                                         |                                                     |  |                                                                                       |                                                                                                  |
|--|---------------------------------------------------------|-----------------------------------------------------|--|---------------------------------------------------------------------------------------|--------------------------------------------------------------------------------------------------|
|  | processes                                               | extinction status                                   |  | statistical algorithms                                                                | al. 2018; Darrah et al. 2017;                                                                    |
|  | Forest health and phenology monitoring                  |                                                     |  | Image recognition technique using neural network and deep learning                    | Nay et al. 2018; Burivalova et al. 2019; Xulu et al. 2019; Park et al. 2019; Correia et al. 2020 |
|  | Forest classification and mapping                       |                                                     |  | Image recognition technique using neural network and deep learning                    | Carreiras et al. 2006; Lin et al. 2019; Brodrik et al. 2019; Watanabe et al. 2018                |
|  | Forest resource quantification and mapping              | Quantifying and mapping biomass and carbon stock    |  | ANNs combined with traditional models                                                 | Were et al. 2015; Dao et al. 2019; Montaño et al. 2017; Deb et al. 2017                          |
|  |                                                         | Quantifying and mapping ecosystem services          |  | AI and ML based statistical algorithms to quantify ecosystem services                 | Chen et al. 2014; Villa et al. 2009; Lee et al. 2019; Willcock et al. 2018                       |
|  | Forest restoration and conservation                     |                                                     |  | Automated seed planting and AI algorithm to identify suitable habitat for restoration | Fromm et al. 2019; Khan and Gupta 2018                                                           |
|  | Detecting and predicting anthropogenic threat to forest | Mapping deforestation                               |  | Pattern recognition, and image recognition using deep learning                        | Ahmadi 2018; Duo et al. 2019; Hufkens et al. 2020                                                |
|  | Hazard assessment and prediction                        | Predicting and detecting forest fire                |  | Pattern recognition, and image recognition using deep learning                        | Sakr et al. (2010); Satir et al. 2016; Zhang et al. 2019; Bui et al. 2017                        |
|  |                                                         | Predicting and detecting pest and diseases outbreak |  | AI and ML based statistical algorithms to recognize the pattern                       | Bilski et al. 2017; Golhani et al. 2018; Rammer and Seidl (2018); Wiesner-Hanks et al. 2019      |
|  |                                                         | Predicting alien species invasion                   |  | Image recognition technique using neural network and deep learning                    | Pu et al. 2008; Ismail et al. 2016; Martinez et al. 2019; Dash et al. 2019                       |

|  |                                                              |                                                                                                                                                    |  |                                                                   |                                                                                                                                                           |
|--|--------------------------------------------------------------|----------------------------------------------------------------------------------------------------------------------------------------------------|--|-------------------------------------------------------------------|-----------------------------------------------------------------------------------------------------------------------------------------------------------|
|  | Illegal felling and wood trafficking                         | Detecting illegal felling                                                                                                                          |  | Pattern recognition, image recognition and automated bioacoustics | Chen and Liaw 2017; Kalhara et al. 2017; Ahmad and Singh 2019; Prasetyo et al. 2018                                                                       |
|  |                                                              | Tracking illegal timber trafficking                                                                                                                |  | Pattern recognition, image recognition and automated bioacoustics | Tang et al. 2017                                                                                                                                          |
|  | Predicting vegetation and species response to climate change |                                                                                                                                                    |  | AI and ML based statistical algorithms to recognize the pattern   | Ostendorf et al. 2001; Rammer and Seidl 2019; Evans et al.2011; Périé and de Blois (2016)                                                                 |
|  | Timber harvesting                                            |                                                                                                                                                    |  | AI and ML based statistical algorithms to recognize the pattern   | Hokans 1984; Çalışkan 2019; John et al. 2016; Lindroos et al. 2017; Proto et al. 2020                                                                     |
|  | Predicting supply and demand of forest resource              |                                                                                                                                                    |  | AI and ML based statistical algorithms to recognize the pattern   | Milovanović et al. 2017; Anandhi et al. 2012.; Zhao and Yuhe (2020)                                                                                       |
|  | Forest hydrology                                             | Modeling precipitation interception by forest canopies and water content in forest canopies<br><br>Terrestrial vegetation and ground water storage |  | AI and ML based statistical algorithms to recognize the pattern   | Stravs et al., 2008; Dube et al., 2017; Trombetti et al., 2008<br><br>Luo et al., 2020; Irrgang et al., 2020; Bhanja et al., 2019; Kamarudin et al., 2021 |
|  |                                                              | Spatiotemporal behaviour of soil moisture in vegetated areas                                                                                       |  | AI and ML based statistical algorithms to recognize the pattern   | Lee et al., 2018; Zhang et al., 2021; de Oliveira et al., 2021                                                                                            |
|  |                                                              | Vegetation evapotranspiration, and water-use efficiency in terrestrial ecosystems                                                                  |  | AI and ML based statistical algorithms to recognize the pattern   | Lu and Zhuang, 2010; Panda et al., 2018; Pan et al., 2020                                                                                                 |

2 **Table S2.** AI start-up companies and non-profits in biodiversity conservation and forest sector.

| <b>Sector</b> | <b>Start-Up Name</b>                                                                                                                                                                                                  | <b>Location</b> | <b>Application</b>                                                                                                                                                                                                                    | <b>Approach</b>                                                                                                                               |
|---------------|-----------------------------------------------------------------------------------------------------------------------------------------------------------------------------------------------------------------------|-----------------|---------------------------------------------------------------------------------------------------------------------------------------------------------------------------------------------------------------------------------------|-----------------------------------------------------------------------------------------------------------------------------------------------|
| Forest        | 20trees.AI ( <a href="https://solarimpulse.com/companies/20tree-ai">https://solarimpulse.com/companies/20tree-ai</a> ) (accessed on 15 June 2021)                                                                     | Portugal        | Real-time forest inventory & sustainable forest management (forest inventory, tree growth and productivity, biomass harvesting, monitoring threat to forest and forest health                                                         | Use remote sensing, big data, cloud computing and artificial intelligence for real-time forest inventory and monitoring.                      |
| Forest        | aiTree ( <a href="http://aitree.ltd/">http://aitree.ltd/</a> ) (accessed on 15 June 2021)                                                                                                                             | Canada          | Solving demand and supply problem in forestry sector (wildlife habitat, biodiversity, water quality, visual quality, carbon storage, improving decisions on timber allocations and conserving natural areas for ecosystem services.). | Use Artificial Intelligence, Big Data and Cloud computing technologies to solve the complicated Demand & Supply problems in Canadian forests. |
| Forest        | ByteLAKE ( <a href="https://www.bytelake.com/en/case-studies/case-study-counting-trees-with-drones/">https://www.bytelake.com/en/case-studies/case-study-counting-trees-with-drones/</a> ) (accessed on 15 June 2021) | USA             | Restoration and forest monitoring                                                                                                                                                                                                     | Company AI platform software dubbed as Ewa Guard uses images captured by drones to count planted seedlings and trees in forest.               |

|        |                                                                                                                                   |                  |                                                                                  |                                                                                                                                                                                                                                                                                                                                                                                                                                                                       |
|--------|-----------------------------------------------------------------------------------------------------------------------------------|------------------|----------------------------------------------------------------------------------|-----------------------------------------------------------------------------------------------------------------------------------------------------------------------------------------------------------------------------------------------------------------------------------------------------------------------------------------------------------------------------------------------------------------------------------------------------------------------|
| Forest | CollectiveCrunch ( <a href="https://www.collectivecrunch.com/">https://www.collectivecrunch.com/</a> ) (accessed on 15 June 2021) | Germany, Finland | Mapping and predicting wood mass, wood species and wood quality of target areas. | The start-up developed an innovative AI platform dubbed as Linda Forest, which is a turn-key SaaS solution that predicts wood mass, wood species and wood quality of target areas far more accurate than any existing conventional methods. The company utilizes climate, geo, and customer process data to make better predictions of forest inventory. Then based on this prediction advise forestry firms about what quality and quantity of wood they are buying. |
| Forest | Dendra ( <a href="https://dendra.io/">https://dendra.io/</a> ) (accessed on 15 June 2021)                                         | UK               | Automated and cost-effective reforestation                                       | Use artificial intelligence-based automation and digital intelligence to identify suitable planting area and disperse seedpods filled with seeds of desired species and nutrients for germination in identified plant location. With Dendra's technology, 10                                                                                                                                                                                                          |

|        |                                                                                                                                                                                                                                                                                                                                          |         |                                                                                                              |                                                                                                                                                                                                                                                                                                         |
|--------|------------------------------------------------------------------------------------------------------------------------------------------------------------------------------------------------------------------------------------------------------------------------------------------------------------------------------------------|---------|--------------------------------------------------------------------------------------------------------------|---------------------------------------------------------------------------------------------------------------------------------------------------------------------------------------------------------------------------------------------------------------------------------------------------------|
|        |                                                                                                                                                                                                                                                                                                                                          |         |                                                                                                              | billion trees can be planted each year and in often hard accessible places                                                                                                                                                                                                                              |
| Forest | Droneseed ( <a href="https://droneseed.com/">https://droneseed.com/</a> ) (accessed on 26 June 2021)                                                                                                                                                                                                                                     | USA     | Automated and cost-effective reforestation                                                                   | Use artificial intelligence-based automation and digital intelligence to identify suitable planting area and disperse seeds of desired species along with nutrients from innovative product called seed vessels. Land Life is on a mission to reforest the world's 2 billion hectares of degraded land. |
| Forest | Erol Foundation, the Center for Global Discovery, and Conservation Science (GDCS) at ASU and Planet.Inc ( <a href="https://csteps.asu.edu/new-satellite-system-can-map-tropical-forest-carbon-emissions">https://csteps.asu.edu/new-satellite-system-can-map-tropical-forest-carbon-emissions</a> ) (accessed on 15 June 2021)           | Peru    | Automatic and cost-effective direct measurement and mapping of carbon stock and emission at high resolution. | Use computer vision models, LiDAR, and satellite imagery at 3-5m resolution for automatic and cost-effective direct measurement and mapping of carbon stock and emission at high resolution and high frequency in Peruvian forest.                                                                      |
| Forest | Finnish Forest Centre ( <a href="https://www.metsakeskus.fi/en">https://www.metsakeskus.fi/en</a> ) ( <a href="https://www.esri.com/about/newsroom/blog/finland-enhances-forest-data-accuracy-for-automation/">https://www.esri.com/about/newsroom/blog/finland-enhances-forest-data-accuracy-for-automation/</a> ) (accessed on 15 June | Finland | Forest inventory and accurate measurement of                                                                 | Use GIS data, imagery sources, climate and weather data and artificial                                                                                                                                                                                                                                  |

|        |                                                                                                                                                  |                             |                                                                                                               |                                                                                                                                                                                                                                                   |
|--------|--------------------------------------------------------------------------------------------------------------------------------------------------|-----------------------------|---------------------------------------------------------------------------------------------------------------|---------------------------------------------------------------------------------------------------------------------------------------------------------------------------------------------------------------------------------------------------|
|        | 2021)                                                                                                                                            |                             | forest stand.                                                                                                 | intelligence for accurate measurements of forest stands and to better predict forest inventory.                                                                                                                                                   |
| Forest | Future Forest Map Project ( <a href="https://www.futureforestmap.ethz.ch/">https://www.futureforestmap.ethz.ch/</a> ) (accessed on 26 June 2021) | Borneo                      | High resolution past and future forest changes in Borneo (Indonesia) to support actors in forest conservation | Use artificial intelligence to harvest the information from the vast amount of satellite imagery and also to learn to see where and when deforestation will occur by modelling the direct drivers from satellite images.                          |
| Forest | GainForest ( <a href="https://www.gainforest.app/">https://www.gainforest.app/</a> ) (accessed on 26 June 2021)                                  | USA, Switzerland, and Spain | To monitor and forecast forest change at high resolution and design carbon payment scheme.                    | Use large amounts of unlabelled satellite imagery, video prediction model, game theory and machine learning based Measurement, Reporting and Verification (MRV) processes to monitor and forecast deforestation and design carbon payment scheme. |
| Forest | Global Forest Watch ( <a href="https://www.globalforestwatch.org/">https://www.globalforestwatch.org/</a> ) (accessed on 27 June 2021)           | USA                         | Global monitoring of deforestation rate in real time                                                          | Use satellite imagery and artificial intelligence to monitor the global forest for deforestation in real                                                                                                                                          |

|        |                                                                                                                                                                                  |           |                                                                                       |                                                                                                                                                                                                                      |
|--------|----------------------------------------------------------------------------------------------------------------------------------------------------------------------------------|-----------|---------------------------------------------------------------------------------------|----------------------------------------------------------------------------------------------------------------------------------------------------------------------------------------------------------------------|
|        |                                                                                                                                                                                  |           |                                                                                       | time.                                                                                                                                                                                                                |
| Forest | Land Life ( <a href="https://landlifecompany.com/">https://landlifecompany.com/</a> ) (accessed on 27 June 2021)                                                                 | Amsterdam | Low-cost, sustainable, and scalable solution to reforestation                         | The Dutch start-up uses GPS, satellite imagery, Cocoon (a seedling support technology), automated planting technique and AI technology for mass scale reforestation and also for monitoring reforestation successes. |
| Forest | MAPIZY ( <a href="https://www.mapizy.com/usecase.html">https://www.mapizy.com/usecase.html</a> ) (accessed on 15 June 2021)                                                      | Australia | Forest inventory and biodiversity monitoring                                          | Use combination of high-resolution satellite images, crowd sourced images, deep learning and other AI technology for forest inventory and biodiversity monitoring.                                                   |
| Forest | Outland Analytics ( <a href="https://blog.particle.io/cellular-iot-forest-protection/">https://blog.particle.io/cellular-iot-forest-protection/</a> ) (accessed on 15 June 2021) | USA       | Real time monitoring of illegal logging and timber theft, protection of natural areas | Uses audio recognition artificial intelligence algorithms to detect chainsaw sound or unauthorized vehicle and send real time alert via email to official to efficiently manage environmental crime.                 |



|        |                                                                                                                                                                                                                                                                                                                                                                                                                                                                            |             |                                                                                                              |                                                                                                                                                             |
|--------|----------------------------------------------------------------------------------------------------------------------------------------------------------------------------------------------------------------------------------------------------------------------------------------------------------------------------------------------------------------------------------------------------------------------------------------------------------------------------|-------------|--------------------------------------------------------------------------------------------------------------|-------------------------------------------------------------------------------------------------------------------------------------------------------------|
| Forest | Pachama ( <a href="https://pachama.com/">https://pachama.com/</a> ) (accessed on 15 June 2021)                                                                                                                                                                                                                                                                                                                                                                             | USA         | Carbon offsetting to preserve forest and encourage reforestation                                             | Uses machine learning on a combination of satellite, drone, and lidar images to precisely estimate individual tree size, volume, and carbon density.        |
| Forest | PlantSnap ( <a href="https://www.plantsnap.com/">https://www.plantsnap.com/</a> ), Pl@ntNet ( <a href="https://identify.plantnet.org/">https://identify.plantnet.org/</a> ), Flora Incognita ( <a href="https://floraincognita.com/">https://floraincognita.com/</a> ), PictureThis ( <a href="https://www.picturethisai.com/">https://www.picturethisai.com/</a> ), PlantSpot ( <a href="https://plantspot.app/">https://plantspot.app/</a> ) (accessed on 2 August 2021) |             | Plant species identification                                                                                 | Identify plant species using database of images                                                                                                             |
| Forest | Satelligence ( <a href="https://satelligence.com/">https://satelligence.com/</a> ) (accessed on 26 June 2021)                                                                                                                                                                                                                                                                                                                                                              | Netherlands | Leverages satellite data to fight deforestation and protecting natural resources                             | By combining satellite images and Artificial Intelligence (AI), the start-up provides up-to-date information on worldwide deforestation, causes and trends. |
| Forest | SILVIATERRA ( <a href="https://ncx.com/">https://ncx.com/</a> ) (accessed on 26 June 2021)                                                                                                                                                                                                                                                                                                                                                                                 | USA         | Forest inventory, quantifying biomass, carbon sequestration and ecosystem services at individual tree level. | Use remote sensing, big data, cloud computing and artificial intelligence to accurately assess forest for biodiversity, biomass, and ecosystem services.    |
| Forest | Terrafuse ( <a href="https://www.terrafuse-ai.com/">https://www.terrafuse-ai.com/</a> ) (accessed on 26 June 2021)                                                                                                                                                                                                                                                                                                                                                         | Canada      | Predicting and mapping wildfire in forest                                                                    | Use physics-enabled AI models to understand                                                                                                                 |

|        |                                                                                                                               |         |                                                          |                                                                                                                                                                                                                                                                                                                                                                                                                  |
|--------|-------------------------------------------------------------------------------------------------------------------------------|---------|----------------------------------------------------------|------------------------------------------------------------------------------------------------------------------------------------------------------------------------------------------------------------------------------------------------------------------------------------------------------------------------------------------------------------------------------------------------------------------|
|        |                                                                                                                               |         |                                                          | climate-related risk at the hyperlocal level. Terrafuse leverages historical wildfire data, numerical simulations, and satellite imagery on Microsoft Azure to model wildfire risk for any location. It also estimates temporal change in carbon density as a result of fire, deforestation and other calamities.                                                                                                |
| Forest | TerraMonitor ( <a href="https://www.terramonitor.com/labs">https://www.terramonitor.com/labs</a> ) (accessed on 26 June 2021) | Finland | Monitoring deforestation and forest health in real time. | Uses database of satellite images collected everyday by multiple satellites and artificial intelligence to create low cost satellite data for natural area management and also monitor deforestation and forest health in real time. Besides an accurate report of logging, the startup promises to improve the way forests are managed and grown, by detecting changes in biodiversity, determining biomass and |

|        |                                                                                                                                                                                           |          |                                                                                                            |                                                                                                                                                                                                                                               |
|--------|-------------------------------------------------------------------------------------------------------------------------------------------------------------------------------------------|----------|------------------------------------------------------------------------------------------------------------|-----------------------------------------------------------------------------------------------------------------------------------------------------------------------------------------------------------------------------------------------|
|        |                                                                                                                                                                                           |          |                                                                                                            | finding out the ratio of various tree types.                                                                                                                                                                                                  |
| Forest | Tesselo ( <a href="https://tesselo.com/solutions-for-sustainability">https://tesselo.com/solutions-for-sustainability</a> ) (accessed on 26 June 2021)                                    | Portugal | Tackling natural disasters such as forest fires.                                                           | Use satellite images and AI to tackle natural disasters, such as forest fires. Using its technology, besides estimating risk or impact of forest fires, start-up also predict the growth of the forest, monitor crops, and even detect pests. |
| Forest | Timbeter ( <a href="https://timbeter.com/">https://timbeter.com/</a> ) (accessed on 26 June 2021)                                                                                         | Estonia  | Precision forestry for optimising forestry, securing legal trade, and fighting illegal logging.            | Uses world's largest database of photometric measurements of roundwood and artificial intelligence for online tracking of roundwood to individual shipments and piles to fight illegal logging.                                               |
| Forest | Xylene ( <a href="https://galileo-masters.eu/winner/xylene-boosting-trust-in-timber/">https://galileo-masters.eu/winner/xylene-boosting-trust-in-timber/</a> ) (accessed on 26 June 2021) | Germany  | Real time tracking of wood supply chain to combat illegal wood supply and to achieve sustainable forestry. | Uses combines of space technology, blockchain and supply chain mapping, automatic data gathered by IoT devices and Earth Observation and AI technology to track wood                                                                          |

|                     |                                                                                                                                                                                                                 |            |                                                                                          |                                                                                                                                                                                                                                      |
|---------------------|-----------------------------------------------------------------------------------------------------------------------------------------------------------------------------------------------------------------|------------|------------------------------------------------------------------------------------------|--------------------------------------------------------------------------------------------------------------------------------------------------------------------------------------------------------------------------------------|
|                     |                                                                                                                                                                                                                 |            |                                                                                          | supply chain.                                                                                                                                                                                                                        |
| Forest              | INTEGRAL ( <a href="https://plus.maths.org/content/understanding-biodiversity-forests-using-ai">https://plus.maths.org/content/understanding-biodiversity-forests-using-ai</a> ) (accessed on 27 February 2022) | India, UK  | A project which aims to understand the diversity of forests in India                     | Use semi-supervised learning technique to identify tree species from aerial images.                                                                                                                                                  |
| Forest and wildlife | Conservation X Labs ( <a href="https://conservationxlabs.com/">https://conservationxlabs.com/</a> ) (accessed on 5 July 2021)                                                                                   | USA        | Identifying solutions to the underlying drivers of human-induced extinction of wildlife. | Use social media, crowd sourced image data, DNA technology and artificial intelligent to detect illegal wildlife and timber trade both in field and online.                                                                          |
| Forest and wildlife | Gramener ( <a href="https://gramener.com/aiforgood/">https://gramener.com/aiforgood/</a> ) (accessed on 5 July 2021)                                                                                            | Australia  | Identification and population census of endangered species. Land mapping.                | Use artificial intelligence and remote sensing to identify and count endangered species to aid in their conservation. Also use artificial intelligence and high-resolution satellite data map land use pattern to plan conservation. |
| Forest and wildlife | iNaturalist ( <a href="https://www.inaturalist.org/">https://www.inaturalist.org/</a> ) (accessed on 5 July 2021)                                                                                               | USA        | Flora and fauna identification                                                           | Use artificial intelligence and crowd sourced images data to identify flora and fauna.                                                                                                                                               |
| Forest and          | Naturalis Biodiversity Center, Observation.org, and COSMONiO ( <a href="https://www.linkedin.com/pulse/collaboration-">https://www.linkedin.com/pulse/collaboration-</a>                                        | Netherland | Collaboration to support and improve biodiversity                                        | The collaboration will focus on using modern                                                                                                                                                                                         |

|                     |                                                                                                                                                                                                                                                                                             |                                                                      |                                                                                                            |                                                                                                                                                                  |
|---------------------|---------------------------------------------------------------------------------------------------------------------------------------------------------------------------------------------------------------------------------------------------------------------------------------------|----------------------------------------------------------------------|------------------------------------------------------------------------------------------------------------|------------------------------------------------------------------------------------------------------------------------------------------------------------------|
| wildlife            | started-support-biodiversity-research-katramados) (accessed on 5 July 2021)                                                                                                                                                                                                                 |                                                                      | research through artificial intelligence                                                                   | machine learning techniques, such as deep learning, to provide easy tools to identify and search through digitized biodiversity data.                            |
| Forest and wildlife | Rainforest Connection (RFCx) ( <a href="https://rfcx.org/">https://rfcx.org/</a> ) (accessed on 26 June 2021)                                                                                                                                                                               | USA                                                                  | Prevent deforestation, halt animal poaching, and monitor forest ecosystem through bioacoustics monitoring. | Uses recycled android phoned powered by portable solar panels, bioacoustics, and machine learning to identify illegal logging and animal poaching in the forest. |
| Wildlife            | Chirpomatic ( <a href="http://www.chirpomatic.com/">http://www.chirpomatic.com/</a> ), Warblr ( <a href="https://www.warblr.co.uk/">https://www.warblr.co.uk/</a> ), Merlin ( <a href="https://merlin.allaboutbirds.org/">https://merlin.allaboutbirds.org/</a> ) (accessed on 5 July 2021) | USA, UK                                                              | Birds' species identification apps                                                                         | Identify bird species using database of bird songs and images                                                                                                    |
| Wildlife            | Connected Conversation ( <a href="https://www.cisco.com/c/en/us/about/csr/impact/environmental-sustainability/connected-conservation.html">https://www.cisco.com/c/en/us/about/csr/impact/environmental-sustainability/connected-conservation.html</a> ) (accessed on 5 July 2021)          | Collaboration between Dimension Data and Cisco Systems, South Africa | Protect global wildlife through the use of modern technology                                               | Uses thermal imaging, IoT and artificial intelligence face recognition technology to send real time alerts to rangers about poachers inside park.                |
| Wildlife            | Conservation Metrics ( <a href="https://conservationmetrics.com/">https://conservationmetrics.com/</a> ) (accessed on 5 July 2021)                                                                                                                                                          | USA                                                                  | Wildlife monitoring and diversity estimation                                                               | Uses cutting-edge remote sensing technology, artificial intelligence, statistical rigor, and extensive scientific                                                |

|          |                                                                                                                                                                                                                                    |                       |                                                                                                                    |                                                                                                                                                                                                                                      |
|----------|------------------------------------------------------------------------------------------------------------------------------------------------------------------------------------------------------------------------------------|-----------------------|--------------------------------------------------------------------------------------------------------------------|--------------------------------------------------------------------------------------------------------------------------------------------------------------------------------------------------------------------------------------|
|          |                                                                                                                                                                                                                                    |                       |                                                                                                                    | expertise to drive down costs and increase the scale and effectiveness of wildlife monitoring and assessing diversity.                                                                                                               |
| Wildlife | DeepMind ( <a href="https://www.deepmind.com/blog/using-machine-learning-to-accelerate-ecological-research">https://www.deepmind.com/blog/using-machine-learning-to-accelerate-ecological-research</a> ) (accessed on 5 July 2021) | UK                    | Wildlife census and management                                                                                     | Uses machine learning to detect and count animals, using millions of pictures taken in the Serengeti National Park in Tanzania.                                                                                                      |
| Wildlife | EarthRanger (Vulcn.inc) ( <a href="https://www.earthranger.com/">https://www.earthranger.com/</a> ) (accessed on 5 July 2021)                                                                                                      | USA (online platform) | Wildlife management in parks and halt poaching to aid endangered species conservation.                             | Uses artificial intelligence, predictive analytics, and radio collared animal and patrol data for real time monitoring and management of wildlife in parks.                                                                          |
| Wildlife | eBird ( <a href="https://ebird.org/home">https://ebird.org/home</a> ) (accessed on 5 July 2021)                                                                                                                                    | USA                   | Identifying bird species, monitoring paths of migratory birds in real time, predicting suitable habitats for birds | Uses crowd sourced bird data and artificial intelligence to identify bird species in real time (Merlin app), to predict where there will be changes in habitat for certain species, and the paths along which birds will move during |

|          |                                                                                                                                          |                          |                                                                                                                                                                                                        |                                                                                                                                                                                                                                                             |
|----------|------------------------------------------------------------------------------------------------------------------------------------------|--------------------------|--------------------------------------------------------------------------------------------------------------------------------------------------------------------------------------------------------|-------------------------------------------------------------------------------------------------------------------------------------------------------------------------------------------------------------------------------------------------------------|
|          |                                                                                                                                          |                          |                                                                                                                                                                                                        | migration.                                                                                                                                                                                                                                                  |
| Wildlife | Global Fishing watch ( <a href="https://globalfishingwatch.org/">https://globalfishingwatch.org/</a> ) (accessed on 5 July 2021)         | International non-profit | Promote ocean fish and seafood sustainability and conservation of ocean biodiversity.                                                                                                                  | Use advanced remote sensing technology, satellite imagery and artificial intelligence to share data about global fishing activity in real time.                                                                                                             |
| Wildlife | Goddard Space Flight Center (NASA) ( <a href="https://www.nasa.gov/goddard">https://www.nasa.gov/goddard</a> ) (accessed on 5 July 2021) | USA                      | Identifying and monitoring population of different species of phytoplankton in ocean to mitigate climate change                                                                                        | Researchers planning to use satellite imagery from PACE (for "Pre-Aerosol Clouds and ocean Ecosystem") and artificial intelligence to identify, monitor and predict individual species population of phytoplankton across globe to mitigate climate change. |
| Wildlife | OceanMind ( <a href="https://www.oceanmind.global/">https://www.oceanmind.global/</a> ) (accessed on 5 July 2021)                        | England                  | Preventing illegal, unreported, and unregulated fishing by analysing vessel movements in real time. AI algorithms identify suspicious behaviour, which OceanMind shares with agencies to direct patrol | Use satellites and AI to preserve biodiversity, protect livelihoods, and prevent slavery in the seafood industry                                                                                                                                            |

|          |                                                                                                                                                                                                                                                                            |                      |                                                          |                                                                                                                                                                                                                                             |
|----------|----------------------------------------------------------------------------------------------------------------------------------------------------------------------------------------------------------------------------------------------------------------------------|----------------------|----------------------------------------------------------|---------------------------------------------------------------------------------------------------------------------------------------------------------------------------------------------------------------------------------------------|
|          |                                                                                                                                                                                                                                                                            |                      | boats more effectively.                                  |                                                                                                                                                                                                                                             |
| Wildlife | Penguin Watch<br>( <a href="https://www.zooniverse.org/projects/penguintom79/penguin-watch">https://www.zooniverse.org/projects/penguintom79/penguin-watch</a> ) (accessed on 5 July 2021)                                                                                 | UK                   | Penguin population count and identification              | Use crowd-sourced annotated images and density-based deep learning algorithms for accurate identification and population count of Individual Penguin species.                                                                               |
| Wildlife | Project Zamba ( <a href="https://zamba.drivendata.org/">https://zamba.drivendata.org/</a> ) (accessed on 5 July 2021)                                                                                                                                                      | Open global platform | Wildlife identification and conservation                 | Uses artificial intelligence and computer vision to evaluate the thousands of video material captured in camera trap to automatically recognise irrelevant information and retain only animal recordings.                                   |
| Wildlife | Protection Assistant for Wildlife Security (PAWS)<br>( <a href="https://sc.cs.cmu.edu/research-detail/102-protection-assistant-for-wildlife-security">https://sc.cs.cmu.edu/research-detail/102-protection-assistant-for-wildlife-security</a> ) (accessed on 5 July 2021) | USA                  | To aid conservation in the fight against animal poaching | PAWS collect information from previous poaching activities, then uses machine learning and behavioral modeling to generate predictions about poaching locations and optimal patrol routes. Therefore, outcome is more effective patrols and |



|          |                                                                                                                                                                                                                                                                                     |                                                         |                                                              |                                                                                                                                                                                                                                                                          |
|----------|-------------------------------------------------------------------------------------------------------------------------------------------------------------------------------------------------------------------------------------------------------------------------------------|---------------------------------------------------------|--------------------------------------------------------------|--------------------------------------------------------------------------------------------------------------------------------------------------------------------------------------------------------------------------------------------------------------------------|
|          |                                                                                                                                                                                                                                                                                     |                                                         |                                                              | better use of resources in the fight against poaching vulnerable species.                                                                                                                                                                                                |
| Wildlife | Reefscape project ( <a href="https://www.oneearth.org/reefscape-a-global-reef-survey-to-build-better-satellites-for-coral-conservation/">https://www.oneearth.org/reefscape-a-global-reef-survey-to-build-better-satellites-for-coral-conservation/</a> ) (accessed on 5 July 2021) | Australia                                               | Global coral reef monitoring for conservation                | Use artificial intelligence and drone mounted camera images to accurately survey reefs and assess the composition and health of coral reefs under the water over time.                                                                                                   |
| Wildlife | RESLOVE ( <a href="https://www.resolve.ngo/trailguard.htm">https://www.resolve.ngo/trailguard.htm</a> ) (accessed on 5 July 2021)                                                                                                                                                   | Collaboration between non-profit RESLOVE and Intel, USA | Protect global wildlife through the use of modern technology | Uses technology called TrailGuard AI, which detects humans among motion activated camera traps using image processing, deep neural network algorithms for object detection and image classification. Then triggers electronic alerts to park personnel to stop poaching. |
| Wildlife | WhaleShark.org, sharkbook.ai ( <a href="https://www.sharkbook.ai/">https://www.sharkbook.ai/</a> ) (accessed on 5 July 2021)                                                                                                                                                        |                                                         | Whales and shark's species identification                    | Cutting-edge AI software supports rapid identification using pattern recognition and photo management tools                                                                                                                                                              |

|                                 |                                                                                                                                                                                                                                                                                                            |                                                                                                                                      |                                                                                                                            |                                                                                                                                                                                                 |
|---------------------------------|------------------------------------------------------------------------------------------------------------------------------------------------------------------------------------------------------------------------------------------------------------------------------------------------------------|--------------------------------------------------------------------------------------------------------------------------------------|----------------------------------------------------------------------------------------------------------------------------|-------------------------------------------------------------------------------------------------------------------------------------------------------------------------------------------------|
| Wildlife                        | Wild Me ( <a href="https://www.wildme.org/#/">https://www.wildme.org/#/</a> ) (accessed on 5 July 2021)                                                                                                                                                                                                    | USA                                                                                                                                  | Identifying and Conserving species that are on the verge of extinction                                                     | Use citizen science data, artificial intelligence, and cloud computing to power Wildbook, a platform that utilizes technology to scan and identify individual animals and species               |
| Wildlife                        | Wildbook ( <a href="https://lynx.wildbook.org/">https://lynx.wildbook.org/</a> ) (accessed on 5 July 2021)                                                                                                                                                                                                 | USA                                                                                                                                  | Population census and analysis and species conservation                                                                    | Wildbook blends structured wildlife research with artificial intelligence, citizen science, and computer vision to speed population analysis and develop new insights to help fight extinction. |
| Wildlife                        | WildTrack ( <a href="https://wildtrack.org/">https://wildtrack.org/</a> ) (accessed on 5 July 2021)                                                                                                                                                                                                        | USA                                                                                                                                  | Non-invasive wildlife monitoring and identification                                                                        | Uses database of footprint images and artificial intelligence to monitor and identify animals in the wild.                                                                                      |
| Aquatic and marine biodiversity | The AIME project (Artificial Intelligence for Marine Ecosystems) ( <a href="https://www.afd.fr/en/presse-release/artificial-intelligence-in-support-of-marine-biodiversity">https://www.afd.fr/en/presse-release/artificial-intelligence-in-support-of-marine-biodiversity</a> ) (accessed on 1 June 2022) | Franco-African consortium: Université Cadi Ayyad (Morocco), Université de Yaoundé (Cameroon), the Medical Imaging and Bioinformatics | The AIME project will provide valuable tools to support decision-making for coastal marine ecosystem management strategies | This project targets three scientific challenges: (1) the combination or hybridization of AI techniques aimed at improving the accuracy and precision of biodiversity indicators; (2)           |

|                                        |                                                                                                                                                                                                                                                                                                                                          |                                                                                                                                                                                                                                                                                                                      |  |                                                                                                                                                                                                                                                                                                                         |
|----------------------------------------|------------------------------------------------------------------------------------------------------------------------------------------------------------------------------------------------------------------------------------------------------------------------------------------------------------------------------------------|----------------------------------------------------------------------------------------------------------------------------------------------------------------------------------------------------------------------------------------------------------------------------------------------------------------------|--|-------------------------------------------------------------------------------------------------------------------------------------------------------------------------------------------------------------------------------------------------------------------------------------------------------------------------|
|                                        |                                                                                                                                                                                                                                                                                                                                          | <p>Laboratory at Université Gaston Berger de Saint-Louis (Senegal), ENTROPIE, a Mixed Research Unit working on the tropical marine ecology of the Pacific and Indian Oceans (New Caledonia, France), and the Research Institute for Development and Marine biodiversity, exploitation and conservation (France).</p> |  | <p>the development of multi-scale indicators reflecting the various health aspects and pressures facing marine ecosystems; and (3) their integration in an AI model capable of explaining and predicting the spatial and temporal dynamics of marine biodiversity in case studies.</p>                                  |
| <p>Aquatic and marine biodiversity</p> | <p>The SMART-BIODIV project (Artificial Intelligence Technologies for Biodiversity Research) (<a href="https://www.afd.fr/en/presse-release/artificial-intelligence-in-support-of-marine-biodiversity">https://www.afd.fr/en/presse-release/artificial-intelligence-in-support-of-marine-biodiversity</a>) (accessed on 1 June 2022)</p> | <p>Franco-American consortium: Georgia-Tech (USA), Central Supélec Loria (France), the Interdisciplinary Laboratory for Continental Environments and the Laboratory of Oceanography of Villefranche (France)</p>                                                                                                     |  | <p>It will develop new methods for managing and integrating biodiversity data from coastal marine environments using automatic learning algorithms to fill in missing data and develop suitable indicators for assessing the biodiversity of the areas observed. This project also proposes to make large data sets</p> |

|  |                                                                                                                                                                                                                                                                                                          |                                                                                                                                                                                                                                                                                                                                                       |                                                                                                                                            |                                                                                                                                                                                                                                                                                                                                                                                   |
|--|----------------------------------------------------------------------------------------------------------------------------------------------------------------------------------------------------------------------------------------------------------------------------------------------------------|-------------------------------------------------------------------------------------------------------------------------------------------------------------------------------------------------------------------------------------------------------------------------------------------------------------------------------------------------------|--------------------------------------------------------------------------------------------------------------------------------------------|-----------------------------------------------------------------------------------------------------------------------------------------------------------------------------------------------------------------------------------------------------------------------------------------------------------------------------------------------------------------------------------|
|  |                                                                                                                                                                                                                                                                                                          |                                                                                                                                                                                                                                                                                                                                                       |                                                                                                                                            | containing millions of images of planktonic organisms available to the scientific community.                                                                                                                                                                                                                                                                                      |
|  | <p>The FISH-PREDICT project (Predict Reef-Fish Biodiversity) (<a href="https://www.afd.fr/en/presse-release/artificial-intelligence-in-support-of-marine-biodiversity">https://www.afd.fr/en/presse-release/artificial-intelligence-in-support-of-marine-biodiversity</a>) (accessed on 1 June 2022)</p> | <p>The Marine biodiversity exploitation and conservation research unit, the Montpellier Laboratory of Informatics, Robotics and Microelectronics, the Center for Functional and Evolutionary Ecology (CEFE), Lab-STICC (a research laboratory in Information and Communication Science and Technology), and the Alpine Ecology Laboratory (LECA).</p> | <p>It aims to discover intelligent solutions for nature in order to strengthen the sustainability of coastal socio-ecological systems.</p> | <p>This project seeks to create ecological indicators and predictive models for the biodiversity of disturbed ecosystems by combining artificial intelligence methods with well-known assessment approaches. It will also result in the creation of the first knowledge base on marine biodiversity and, thereafter, the development of predictive and interpretative models.</p> |

## References

- Allken, V.; Handegard, N.O.; Rosen, S.; Schreyeck, T.; Mahiout, T.; Malde, K. Fish species identification using a convolutional neural network trained on synthetic data. *ICES J. Mar. Sci.* **2019**, *76*, 342–349.
- Álvarez-Ellacuría, A.; Palmer, M.; Catalán, I.A.; Lisani, J.L. Image-based, unsupervised estimation of fish size from commercial landings using deep learning. *ICES J. Mar. Sci.* **2020**, *77*, 1330–1339.
- Awad, M. Sea water chlorophyll-a estimation using hyperspectral images and supervised artificial neural network. *Ecol. Inform.* **2014**, *24*, 60–68.
- Barzegar, R.; Adamowski, J.; Moghaddam, A.A. Application of wavelet-artificial intelligence hybrid models for water quality prediction: a case study in Aji-Chay River, Iran. *Stoch. Env. Res. Risk A* **2016**, *30*, 1797–1819.
- Bedoya, C.; Isaza, C.; Daza, J.M.; López, J.D. Automatic recognition of anuran species based on syllable identification. *Ecol. Inform.* **2014**, *24*, 200–209.
- Berberoglu, S.; Yilmaz, K.T.; Özkan, C. Mapping and monitoring of coastal wetlands of Cukurova Delta in the Eastern Mediterranean region. *Biodivers. Conserv.* **2004**, *13*, 615–633.
- Bevan, E.; Wibbels, T.; Najera, B.M.; Martinez, M.A.; Martinez, L.A.; Martinez, F.I.; Cuevas, J.M.; Anderson, T.; Bonka, A.; Hernandez, M.H.; et al. Unmanned aerial vehicles (UAVs) for monitoring sea turtles in near-shore waters. *Mar. Turt. Newsl.* **2015**, *145*, 19–22.
- Brey, T. A multi-parameter artificial neural network model to estimate macrobenthic invertebrate productivity and production. *Limnol. Oceanogr.-Methods* **2012**, *10*, 581–589.
- Brosse, S.; Lek, S.; Townsend, C.R. Abundance, diversity, and structure of freshwater invertebrates and fish communities: An artificial neural network approach. *N. Zeal. J. Mar. Freshw.* **2001**, *35*, 135–145.
- Ceccaroni, L.; Velickovski, F.; Blaas, M.; Wernand, M.R.; Blauw, A.; Subirats, L. Artificial intelligence and earth observation to explore water quality in the Wadden Sea. *Earth Obs. Open Sci. Innov.* **2018**, *15*, 311–320.
- Chang, N.B.; Mohiuddin, G.; Crawford, A.J.; Bai, K.; Jin, K.R. Diagnosis of the artificial intelligence-based predictions of flow regime in a constructed wetland for stormwater pollution control. *Ecol. Inform.* **2018**, *28*, 42–60.
- Chau, K.W. A review on integration of artificial intelligence into water quality modelling. *Mar. Pollut. Bull.* **2006**, *52*, 726–733.
- Cheng, L.; Lek, S.; Lek-Ang, S.; Li, Z. Predicting fish assemblages and diversity in shallow lakes in the Yangtze River basin. *Limnologica* **2012**, *42*, 127–136.
- Cheung, W.W.; Pitcher, T.J.; Pauly, D. A fuzzy logic expert system to estimate intrinsic extinction vulnerabilities of marine fishes to fishing. *Biol. Conserv.* **2005**, *124*, 97–111.
- Coad, P.; Cathers, B.; Ball, J.E.; Kadluczka, R. Proactive management of estuarine algal blooms using an automated monitoring buoy coupled with an artificial neural network. *Environ. Model. Softw.* **2014**, *61*, 393–409.
- dos Santos, A.A.; Gonçalves, W.N.; 2019. Improving Pantanal fish species recognition through taxonomic ranks in convolutional neural networks. *Ecol. Inform.* **2019**, *53*, 100977.
- Elkiran, G.; Nourani, V.; Abba, S.I. Multi-step ahead modelling of river water quality parameters using ensemble artificial intelligence-based approach. *J. Hydrol.* **2019**, *577*, 123962.
- Fathian, F.; Mehdizadeh, S.; Sales, A.K.; Safari, M.J.S. Hybrid models to improve the monthly river flow prediction. Integrating artificial intelligence and non-linear time series models. *J. Hydrol.* **2019**, *575*, 1200–1213.
- Feio, M.J.; Poquet, J.M. Predictive models for freshwater biological assessment: statistical approaches, biological elements and the Iberian Peninsula experience: a review. *Int. Rev. Hydrobiol.* **2011**, *96*, 321–346.
- Fijani, E.; Barzegar, R.; Deo, R.; Tziritis, E.; Skordas, K. Design and implementation of a hybrid model based on two-layer decomposition method coupled with extreme learning machines to support real-time environmental monitoring of water quality parameters. *Sci. Total Environ.* **2019**, *648*, 839–853.

- Flombaum, P.; Gallegos, J.L.; Gordillo, R.A.; Rincón, J.; Zabala, L.L.; Jiao, N.; Karl, D.M.; Li, W.K.; Lomas, M.W.; Veneziano, D.; et al. Present and future global distributions of the marine Cyanobacteria *Prochlorococcus* and *Synechococcus*. *Proc. Natl. Acad. Sci. USA* **2013**, *110*, 9824–9829.
- Franceschini, S.; Mattei, F.; D'Andrea, L.; Di Nardi, A.; Fiorentino, F.; Garofalo, G.; Scardi, M.; Cataudella, S.; Russo, T. Rummaging through the bin: Modelling marine litter distribution using Artificial Neural Networks. *Mar. Pollut. Bull.* **2019**, *149*, 110580.
- Gan, J.; Cerutti, P.O.; Masiero, M.; Pettenella, D.; Andrighetto, N.; Dawson, T. Quantifying illegal logging and related timber trade. *IUFRO World Ser.* **2016**, *35*, 37–59.
- Gharibi, H.; Mahvi, A.H.; Nabizadeh, R.; Arabalibeik, H.; Yunesian, M.; Sowlat, M.H. A novel approach in water quality assessment based on fuzzy logic. *J. Environ. Manag.* **2012**, *112*, 87–95.
- Gillard, M.; Thiébaud, G.; Deleu, C.; Leroy, B. Present and future distribution of three aquatic plants taxa across the world: Decrease in native and increase in invasive ranges. *Biol. Invasions* **2017**, *19*, 2159–2170.
- Goethals, P.L.; Dedecker, A.P.; Gabriels, W.; Lek, S.; De Pauw, N. Applications of artificial neural networks predicting macroinvertebrates in freshwaters. *Aquat. Ecol.* **2007**, *41*, 491–508.
- Gray, P.C.; Fleishman, A.B.; Klein, D.J.; McKown, M.W.; Bézy, V.S.; Lohmann, K.J.; Johnston, D.W. A convolutional neural network for detecting sea turtles in drone imagery. *Methods Ecol. Evol.* **2019**, *10*, 345–355.
- Guénard, G.; Morin, J.; Matte, P.; Secretan, Y.; Valiquette, E.; Mingelbier, M. Deep learning habitat modeling for moving organisms in rapidly changing estuarine environments: A case of two fishes. *Estuar. Coast. Shelf Sci.* **2020**, *238*, 106713.
- Gunda, N.S.K.; Gautam, S.H.; Mitra, S.K. Artificial intelligence based mobile application for water quality monitoring. *J Electrochem. Soc.* **2019**, *166*, B3031.
- Hameed, M.; Sharqi, S.S.; Yaseen, Z.M.; Afan, H.A.; Hussain, A.; Elshafie, A. Application of artificial intelligence (AI) techniques in water quality index prediction: a case study in tropical region, Malaysia. *Neural Comput. Appl.* **2017**, *28*, 893–905.
- Hatzikos, E.V.; Bassiliades, N.; Asmanis, L.; Vlahavas, I. Monitoring water quality through a telematic sensor network and a fuzzy expert system. *Expert Syst.* **2007**, *24*, 143–161.
- Hatzikos, E.V.; Tsoumakas, G.; Tzanis, G.; Bassiliades, N.; Vlahavas, I. An empirical study on sea water quality prediction. *Knowl.-Based Syst.* **2008**, *21*, 471–478.
- Hodgson, A.; Kelly, N.; Peel, D. Unmanned aerial vehicles (UAVs) for surveying marine fauna: a dugong case study. *PLoS ONE* **2013**, *8*, e79556.
- Hu, J.H.; Tsai, W.P.; Cheng, S.T.; Chang, F.J. Explore the relationship between fish community and environmental factors by machine learning techniques. *Environ. Res.* **2020**, *184*, 109262.
- India State of Forest Report 2019. Available online: <https://fsi.nic.in/forest-report> (accessed on 15 June 2021).
- Joppa, L.N. The case for technology investments in the environment. *Nature* **2017**, *552*, 325.
- Kehoe, B.; Patil, S.; Abbeel, P.; Goldberg, K. A survey of research on cloud robotics and automation. *IEEE Trans. Autom. Sci. Eng.* **2015**, *12*, 398–409.
- Khaki, M.; Yusoff, I.; Islami, N. Application of the Artificial Neural Network and Neuro-fuzzy System for Assessment of Groundwater Quality. *CLEAN–Soil Air Water* **2015**, *43*, 551–560.
- Knudby, A.; Brenning, A.; LeDrew, E. New approaches to modelling fish–habitat relationships. *Ecol. Modelling* **2010**, *221*, 503–511.
- Kocev, D.; Naumoski, A.; Mitreski, K.; Krstic, S.; Dzeroski, S. Learning habitat models for the diatom community in lake Prespa. *Ecol. Modelling* **2010**, *221*, 330–337.
- Kroodsmas, D.A.; Mayorga, J.; Hochberg, T.; Miller, N.A.; Boerder, K.; Ferretti, F.; Wilson, A.; Bergman, B.; White, T.D.; Block, B.A.; et al. Tracking the global footprint of fisheries. *Science* **2018**, *359*, 904–908.
- Labao, A.B.; Naval, P.C., Jr. Cascaded deep network systems with linked ensemble components for underwater fish detection in the wild. *Ecol. Inform.* **2019**, *52*, 103–121.

- Lachkar, Z.; Gruber, N. A comparative study of biological production in eastern boundary upwelling systems using an artificial neural network. *Biogeosciences* **2012**, *9*, 293–308.
- Li, R.; Zou, Z.; An, Y. Water quality assessment in Qu River based on fuzzy water pollution index method. *J. Environ. Sci.* **2016**, *50*, 87–92.
- Mandal, R.; Connolly, R.M.; Schlacher, T.A.; Stantic, B. Assessing fish abundance from underwater video using deep neural networks. In Proceedings of the 2018 International Joint Conference on Neural Networks (IJCNN), Rio de Janeiro, Brazil, 8–13 July 2018; pp. 1–6.
- Marini, S.; Corgnati, L.; Mantovani, C.; Bastianini, M.; Ottaviani, E.; Fanelli, E.; Aguzzi, J.; Griffa, A.; Poulain, P.M. Automated estimate of fish abundance through the autonomous imaging device GUARD1. *Measurement* **2018**, *126*, 72–75.
- Mastorillo, S.; Lek, S.; Dauba, F.; Belaud, A. The use of artificial neural networks to predict the presence of small-bodied fish in a river. *Freshw. Biol.* **1997**, *38*, 237–246.
- Mohiuddin, G. Remote Sensing with Computational Intelligence Modelling for Monitoring the Ecosystem State and Hydraulic Pattern in a Constructed Wetland. Master's Thesis, University of Central Florida, Orlando, FL, USA, 2015.
- Moitinho-Silva, L.; Steinert, G.; Nielsen, S.; Hardoim, C.C.; Wu, Y.C.; McCormack, G.P.; López-Legentil, S.; Marchant, R.; Webster, N.; Thomas, T.; et al. Predicting the HMA-LMA status in marine sponges by machine learning. *Front. Microbiol.* **2017**, *8*, 752.
- Mosleh, M.A.; Manssor, H.; Malek, S.; Milow, P.; Salleh, A. A preliminary study on automated freshwater algae recognition and classification system. *BMC Bioinform.* **2012**, *13*, S17–S25.
- Muñoz-Mas, R.; Martínez-Capel, F.; Alcaraz-Hernández, J.D.; Mouton, A.M. Can multilayer perceptron ensembles model the ecological niche of freshwater fish species? *Ecol. Modelling* **2015**, *309*, 72–81.
- Najah, A.; El-Shafie, A.; Karim, O.A.; Jaafar, O.; El-Shafie, A.H. An application of different artificial intelligences techniques for water quality prediction. *Int. J. Phys. Sci.* **2011**, *6*, 5298–5308.
- Najah, A.; Elshafie, A.; Karim, O.A.; Jaffar, O. Prediction of Johor River water quality parameters using artificial neural networks. *Eur. J. Sci. Res.* **2009**, *28*, 422–435.
- Nunes, J.A.C.; Cruz, I.C.; Nunes, A.; Pinheiro, H.T. Speeding up coral reef conservation with AI-aided automated image analysis. *Nat. Mach. Intell.* **2020**, *2*, 292.
- Olaya-Marín, E.J.; Martínez-Capel, F.; Vezza, P. A comparison of artificial neural networks and random forests to predict native fish species richness in Mediterranean rivers. *Knowl. Manag. Aquat. Ecosyst.* **2013**, *409*, 7.
- Olden, J.D.; Jackson, D.A. Fish–habitat relationships in lakes: gaining predictive and explanatory insight by using artificial neural networks. *Trans. Am. Fish. Soc.* **2001**, *130*, 878–897.
- Palaniswami, M.; Rao, A.S.; Bainbridge, S. Real-time monitoring of the great barrier reef using internet of things with big data analytics. *ITU J. ICT Discov.* **2017**, *1*, 1–10.
- Palialexis, A.; Georgakarakos, S.; Karakassis, I.; Lika, K.; Valavanis, V.D. Prediction of marine species distribution from presence–absence acoustic data: comparing the fitting efficiency and the predictive capacity of conventional and novel distribution models. *Hydrobiologia* **2011**, *670*, 241.
- Park, Y.S.; Céréghino, R.; Compin, A.; Lek, S. Applications of artificial neural networks for patterning and predicting aquatic insect species richness in running waters. *Ecol. Modelling* **2003**, *160*, 265–280.
- Park, Y.S.; Tison, J.; Lek, S.; Giraudel, J.L.; Coste, M.; Delmas, F. Application of a self-organizing map to select representative species in multivariate analysis: a case study determining diatom distribution patterns across France. *Ecol. Inform.* **2006**, *1*, 247–257.
- Penczak, T.; Kruk, A.; Galicka, W. Implementation of a self-organizing map for investigation of impoundment impact on fish assemblages in a large, lowland river: Long-term study. *Ecol. Modelling* **2012**, *227*, 64–71.
- Pereira, G.C.; Ebecken, N.F. Combining in situ flow cytometry and artificial neural networks for aquatic systems monitoring. *Expert Syst. Appl.* **2011**, *38*, 9626–9632.

- Pisupati, B. *Safeguarding India's Biological Diversity: The Biological Diversity Act*; Farmer's Forum. India's Agriculture Magazine: Mumbai, India, 2011.
- Pittman, S.J.; Brown, K.A. Multi-scale approach for predicting fish species distributions across coral reef seascapes. *PLoS ONE* **2011**, *6*, e20583.
- Rajae, T.; Khani, S.; Ravansalar, M. Artificial intelligence-based single and hybrid models for prediction of water quality in rivers: A review. *Chemometr. Intell. Lab.* **2020**, *200*, 103978.
- Ravindranath, N.H.; Somshekhar, B.S.; Gadgil, M. Carbon flows in Indian forests. *Clim. Chang.* **1997**, *35*, 297–320.
- Recknagel, F. ANNA—Artificial Neural Network model for predicting species abundance and succession of blue-green algae. *Hydrobiologia* **1997**, *349*, 47–57.
- Russo, T.; Franceschini, S.; D'Andrea, L.; Scardi, M.; Parisi, A.; Cataudella, S. Predicting fishing footprint of trawlers from environmental and fleet data: an application of artificial neural networks. *Front. Mar. Sci.* **2019**, *6*, 670.
- Sakizadeh, M. Artificial intelligence for the prediction of water quality index in groundwater systems. *Modeling Earth Syst. Environ.* **2016**, *2*, 8.
- Salman, A.; Siddiqui, S.A.; Shafait, F.; Mian, A.; Shortis, M.R.; Khurshid, K.; Ulges, A.; Schwanecke, U. Automatic fish detection in underwater videos by a deep neural network-based hybrid motion learning system. *ICES J. Mar. Sci.* **2020**, *77*, 1295–1307.
- Schletterer, M.; Füreder, L.; Kuzovlev, V.V.; Beketov, M.A. Testing the coherence of several macroinvertebrate indices and environmental factors in a large lowland river system (Volga River, Russia). *Ecol. Indic.* **2010**, *10*, 1083–1092.
- Sengar, N.; Dutta, M.K.; Sarkar, B. Computer vision based technique for identification of fish quality after pesticide exposure. *Int. J. Food Prop.* **2017**, *20*, 2192–2206.
- Sengorur, B.; Koklu, R.; Ates, A. Water quality assessment using artificial intelligence techniques: SOM and ANN—A case study of Melen River Turkey. *Water Qual. Expos. Health* **2015**, *7*, 469–490.
- Sharaf El Din, E.; Zhang, Y.; Suliman, A. Mapping concentrations of surface water quality parameters using a novel remote sensing and artificial intelligence framework. *Int. J. Remote Sens.* **2017**, *38*, 1023–1042.
- Sharma, V.; Chaudhry, S. An overview of Indian forestry sector with REDD. *Int. Sch. Res. Not.* **2013**, *2013*, 298735.
- Siddiqui, S.A.; Salman, A.; Malik, M.I.; Shafait, F.; Mian, A.; Shortis, M.R.; Harvey, E.S. Automatic fish species classification in underwater videos: exploiting pre-trained deep neural network models to compensate for limited labelled data. *ICES J. Mar. Sci.* **2018**, *75*, 374–389.
- Singh, K.P.; Gupta, S.; Rai, P. Predicting acute aquatic toxicity of structurally diverse chemicals in fish using artificial intelligence approaches. *Ecotoxicol. Environ. Saf.* **2013**, *95*, 221–233.
- Sinha, B.; Kala, C.P.; Katiyar, A.S. *Enhancing Livelihoods of Forest Dependent Communities through Synergizing FDA Activities with Other Development Programs*; RCNAEB Sponsored Project; Indian Institute of Forest Management (IIFM): Bhopal, India, 2010.
- Song, H.; Xu, F.; Zheng, B.; Xiang, Y.; Yang, J.; An, X. An artificial intelligence recognition algorithm for Yangtze finless porpoise. In Proceedings of the OCEANS 2015—MTS/IEEE Washington, Washington, DC, USA, 19–22 October 2015; pp. 1–6.
- Strobl, R.O.; Robillard, P.D. Artificial intelligence technologies in surface water quality monitoring. *Water Int.* **2006**, *31*, 198–209.
- Tang, M.; Jiao, Y.; Jones, J.W. A hierarchical Bayesian approach for estimating freshwater mussel growth based on tag-recapture data. *Fish. Res.* **2014**, *149*, 24–32.
- Toro, C.H.F.; Meire, S.G.; Gálvez, J.F.; Fdez-Riverola, F. A hybrid artificial intelligence model for river flow forecasting. *Appl. Soft. Comput.* **2013**, *13*, 3449–3458.
- Tsai, W.P.; Huang, S.P.; Cheng, S.T.; Shao, K.T.; Chang, F.J. A data-mining framework for exploring the multi-relation between fish species and water quality through self-organizing map. *Sci. Total Environ.* **2017**, *579*, 474–483.



- Tung, T.M.; Yaseen, Z.M. A survey on river water quality modelling using artificial intelligence models: 2000–2020. *J. Hydrol.* **2020**, *585*, 124670.
- Villon, S.; Mouillot, D.; Chaumont, M.; Darling, E.S.; Subsol, G.; Claverie, T.; Villéger, S. A deep learning method for accurate and fast identification of coral reef fishes in underwater images. *Ecol. Inform.* **2018**, *48*, 238–244.
- Volf, G.; Atanasova, N.; Kompare, B.; Precali, R.; Oani, N. Descriptive and prediction models of phytoplankton in the northern adriatic. *Ecol. Modelling* **2011**, *222*, 2502–2511.
- Wang, P.; Yao, J.; Wang, G.; Hao, F.; Shrestha, S.; Xue, B.; Xie, G.; Peng, Y. Exploring the application of artificial intelligence technology for identification of water pollution characteristics and tracing the source of water quality pollutants. *Sci. Total Environ.* **2019**, *693*, 133440.
- Watts, M.J.; Li, Y.; Russell, B.D.; Mellin, C.; Connell, S.D.; Fordham, D.A.; A novel method for mapping reefs and subtidal rocky habitats using artificial neural networks. *Ecol. Modelling* **2011**, *222*, 2606–2614.
- Xia, C.; Fu, L.; Liu, Z.; Liu, H.; Chen, L.; Liu, Y. Aquatic toxic analysis by monitoring fish behavior using computer vision: A recent progress. *J. Toxicol.* **2018**, *2018*, 2591924.
- Xu, L.; Bennamoun, M.; An, S.; Sohel, F.; Boussaid, F. Deep learning for marine species recognition. In *Handbook of Deep Learning Applications*; Springer: Cham, Switzerland, 2019; pp. 129–145. [https://doi.org/10.1007/978-3-030-11479-4\\_7](https://doi.org/10.1007/978-3-030-11479-4_7).
- Yaseen, Z.M.; Kisi, O.; Demir, V. Enhancing long-term streamflow forecasting and predicting using periodicity data component: application of artificial intelligence. *Water Resour. Manag.* **2016**, *30*, 4125–4151.
- Yoo, J.W.; Lee, Y.W.; Lee, C.G.; Kim, C.S. Effective prediction of biodiversity in tidal flat habitats using an artificial neural network. *Mar. Environ. Res.* **2013**, *83*, 1–9.
- Zarkami, R.; Sadeghi, R.; Goethals, P. Use of fish distribution modelling for river management. *Ecol. Modelling* **2012**, *230*, 44–49.
- Zhu, X.; Li, D.; He, D.; Wang, J.; Ma, D.; Li, F. A remote wireless system for water quality online monitoring in intensive fish culture. *Comput. Electron. Agric.* **2010**, *71*, S3–S9.
